# Supplementary material
Source: PubMed Central journal article supplement (PMC3828750)

## **SUPPLEMENTAL FIGURE LEGENDS**

### **Figure S1. Cellular Me-PABP1 level decreases after 15 days of Dox treatment with multiple cell passages.**

MCF7-tet-on-shCARM1 cells were cultured in medium in the presence or absence of 500 ng/ml Dox for 15 days with multiple cell passages. Whole cell extracts were obtained and analyzed for the expression of endogenous CARM1, Me-PABP1 level, expression of PABP1 and  $\beta$ -actin by western blots.

### **Figure S2. TR-FRET background signal from Tb-2<sup>nd</sup> antibody alone.**

MCF7 cells were infected with indicated amounts of BacMam GFP-PABP1 virus in a 384-well plate for 24 hours. TR-FRET ratios were measured with Tb-2<sup>nd</sup> antibody alone, indicating the background signals for Me-GFP-PABP1 TR-FRET assay. Data are mean  $\pm$  SD of three independent experiments.

### **Figure S3. Optimization of key parameters for Me-GFP-PABP1 TR-FRET assay with different amounts of BacMam GFP-PABP1 virus.**

MCF7 cells were infected with indicated amounts of BacMam GFP-PABP1 virus in a 384-well plate for 24 hours. Me-GFP-PABP1 TR-FRET assay was optimized for Me-PABP1 antibody concentration (A), cell number per well (B), and lysis buffer equilibration time (C). Data are mean  $\pm$  SD of three independent experiments.

**Figure S4. Determination of DMSO tolerance of BacMam virus-mediated GFP-PABP1 expression in MCF7 cells.**

MCF7 cells were infected with 10% BacMam GFP-PABP1 virus in a 384-well plate and treated with serially-diluted DMSO for 24 hours. GFP expression was examined under a fluorescence microscope.

**Figure S1**

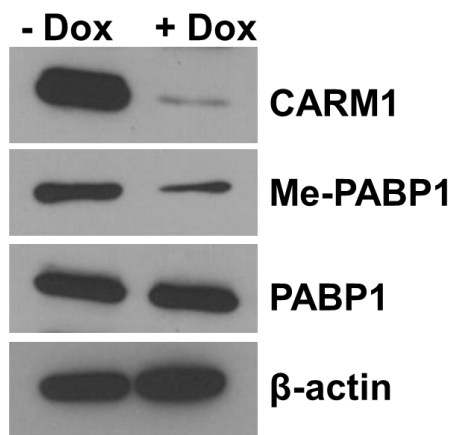

Figure S2

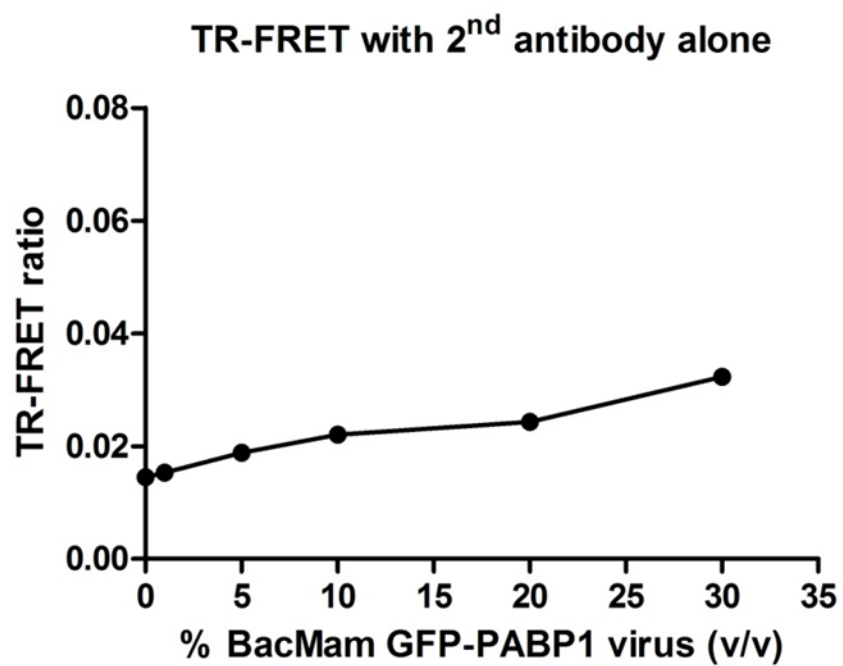

Figure S3

A)

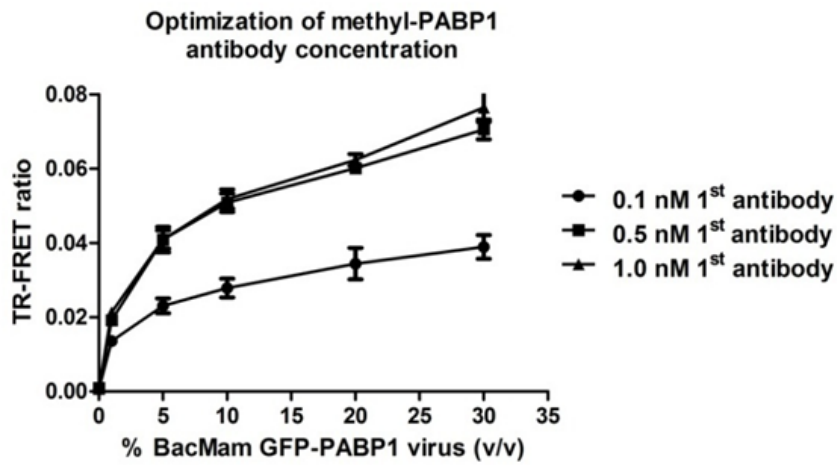

B)

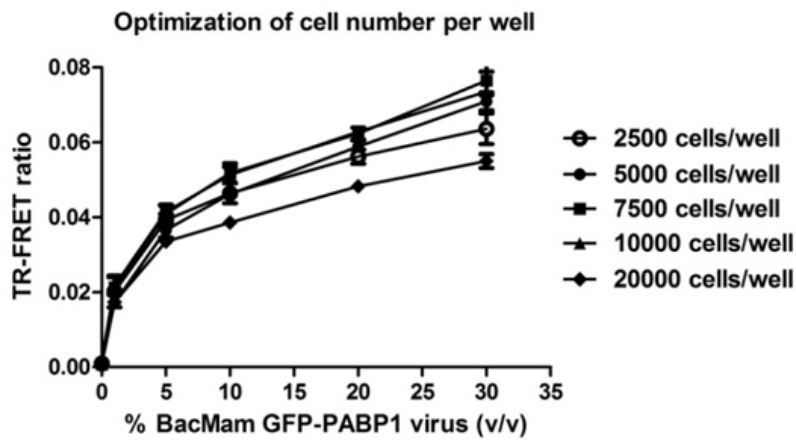

C)

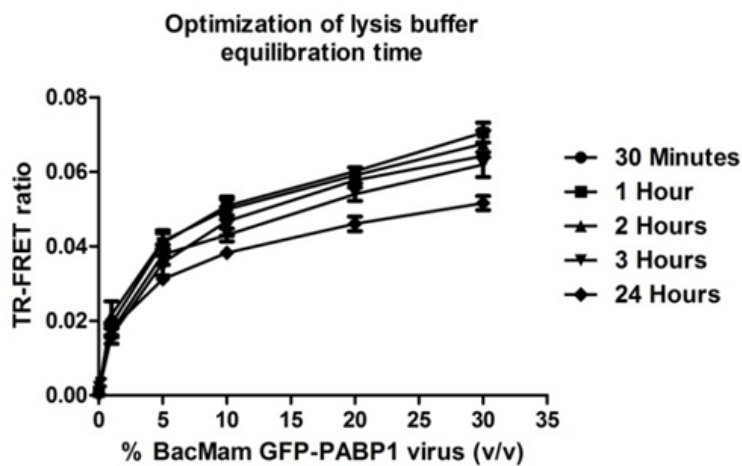

**Figure S4**

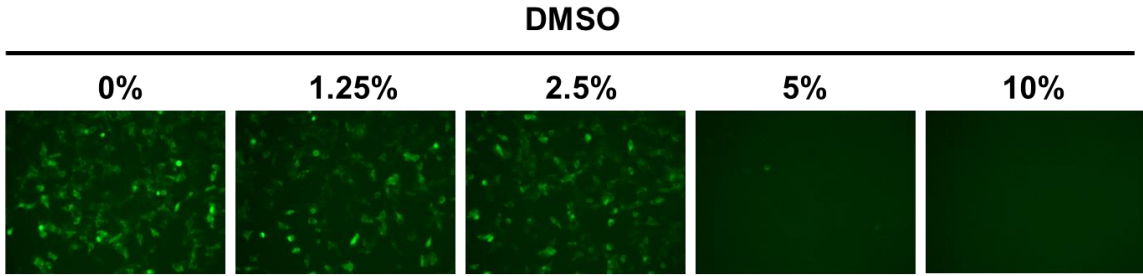

Supplement: NIHMS502276-supplement-Supporting_Information.pdf [file NIHMS502276-supplement-Supporting_Information.pdf]
